# Supplementary material for: Impact of A Cargo-Less Liposomal Formulation on Dietary Obesity-Related Metabolic Disorders in Mice
Source: MDPI journal article supplement (doi:10.3390/ijms21207640), 2020-10-15
Supplement: s1 [file s1]

# Impact of Cargo-less Liposomal Formulation on Dietary Obesity-Related Metabolic Disorders in Mice

Varsha Komalla<sup>1,2</sup>, Behjat Sheikholeslami<sup>1,2</sup>, Gerard Li<sup>3</sup>, Bishwajit Bokshi<sup>1,4</sup>, Yik Lung Chan<sup>2,3</sup>, Alison Ung<sup>4</sup>, Brian Gregory Oliver<sup>2,3</sup>, Hui Chen<sup>3</sup>, Mehra Haghi<sup>1\*</sup>

<sup>1</sup> Graduate School of Health, University of Technology Sydney, Chippendale, NSW 2008, Australia

<sup>2</sup> Woolcock Institute of Medical Research, The University of Sydney, Glebe, NSW 2037, Australia

<sup>3</sup> School of Life Sciences, University of Technology Sydney, Ultimo, NSW 2007, Australia

<sup>4</sup> School of Mathematical and Physical Sciences, University of Technology Sydney, Ultimo, NSW 2007, Australia

\* Correspondence: Mehra Haghi, Graduate School of Health, University of Technology Sydney, Building 20, 100-102 Broadway, Chippendale, NSW 2008, Australia. E-mail: Mehra.Haghi@uts.edu.au. Phone: +61 2 95149296.

## Supplementary Methods:

The animal experiments were approved by the Animal Care and Ethics Committee of the University of Technology Sydney (Ethics no: ETH18-2214) and carried out according to the Australian National Health and Medical Research Council Guide for the Care and Use of Laboratory Animals. Six-week-old C57BL/6 mice (male, Australian Resource Centre, WA, Australia) were randomized into 3 groups after a week of acclimatisation. The high-fat diet (HFD) group mice were fed a pelleted HFD (20 KJ/g, 43% fat, Speciality feeds, WA, Australia) for 6 weeks. From the 7<sup>th</sup> week, an intraperitoneal (i.p) injection of either 1) Corn oil (vehicle control), 2) 1,2-dioleoyl-sn-glycero-3-phosphocholine (DOPC) in the form of liposomes, or 3) DOPC + Cholesterol in corn oil, was administered once daily for a total of 4 weeks in HFD-fed mice with the HFD feeding. Body weights were monitored weekly. Intraperitoneal glucose tolerance test (IPGTT) was performed three days before the endpoint. Fat pads were collected and weighed.

## Results

DOPC liposome treatment induced a 5% reduction in body weight compared with HFD-oil mice, with significantly reduced fat mass ( $P < 0.05$  for retroperitoneal (Rp) fat,  $P < 0.01$  for testicular fat vs HFD-Oil group, Table A1). DOPC + cholesterol mixture had no impact on body weight, nor fat mass.

As shown in Figure A1, HFD-fed mice receiving DOPC liposomes treatment had some improvement in blood glucose levels during IPGTT in comparison with the HFD-Oil group ( $P < 0.001$  for 60 and 90 mins). DOPC + cholesterol mixture only reduced blood glucose level at 60 min during IPGTT ( $P < 0.001$  vs HFD-oil). The area under the curve (AUC) was significantly lower in the HFD-DOPC liposome group ( $P < 0.05$  compared to the HFD-Oil group). Interestingly, no significant difference was seen between HFD-DOPC+Cholesterol and HFD-oil groups.

## Appendix A

Table 1. Anthropometric parameters of the mice treated with oil, DOPC liposomes, and DOPC+Cholesterol mixture.

| Parameters                  | HFD-Oil      | HFD-DOPC liposomes | HFD-DOPC+cholesterol |
|-----------------------------|--------------|--------------------|----------------------|
| Body weight at 0 week (g)   | 18.73 ± 0.30 | 18.98 ± 0.36       | 18.98 ± 0.26         |
| Body weight at 10 weeks (g) | 36.35 ± 1.30 | 34.47 ± 1.12       | 36.28 ± 0.91         |
| Rp fat (g)                  | 0.69 ± 0.06  | 0.46 ± 0.07*       | 0.58 ± 0.07          |
| %                           | 1.87 ± 0.17  | 1.30 ± 0.18**      | 1.57 ± 0.17          |
| Testicular fat (g)          | 1.70 ± 0.14  | 1.16 ± 0.19**      | 1.46 ± 0.18          |
| %                           | 4.63 ± 0.25  | 3.31 ± 0.46**      | 3.98 ± 0.44          |

Data are expressed as mean ± S.E.M. and were analysed using one-way ANOVA, followed by post hoc Fisher's LSD tests. n = 12. \* P < 0.05 vs. HFD-Oil; \*\* P < 0.01 vs. HFD-Oil.

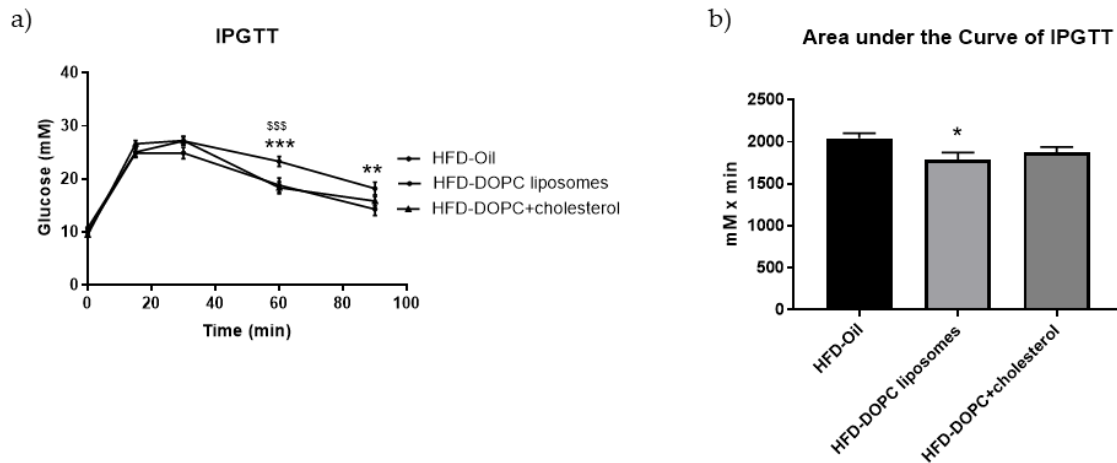

Figure 1. a) An intraperitoneal glucose tolerance test (IPGTT, glucose 2g/kg) after 4 weeks of treatments. b) Area under the curve (AUC) of the IPGTT in (a). Results are expressed as mean ± S.E.M, n = 10-12. a) Data were analyzed using two-way ANOVA followed by post hoc Fischer's LSD test. b) Data were analysed using one-way ANOVA by post hoc Fischer's LSD test. \*\*\* P < 0.001, HFD-oil vs.HFD-DOPC liposomes at 60 mins; \$\$\$P<0.001, HFD-oil vs. HFD-DOPC+Cholesterol at 60 mins;. \*\* P < 0.01, HFD-oil vs.HFD-DOPC liposomes at 90 mins.

Table A2. TaqMan® probe information (Life Technologies, CA, USA)

| Gene            | NCBI gene references               | Probe sequence                | Assay ID      |
|-----------------|------------------------------------|-------------------------------|---------------|
| <i>TNFα</i>     | NM_013693.2,X02611.1,M13049.1      | CCCTCACACTCAGATCATCTTCT<br>CA | Mm00443259_g1 |
| <i>TLR4</i>     | NM_021297.2,AF095353.1,AF110133.1  | CCCTGCATAGAGGTAGTTCCTAA<br>TA | Mm00445273_m1 |
| <i>FASN</i>     | NM_007988.3,AF127033.1,AK147214.1  | AGCAATTGTGGATGGAGGTATCA<br>AC | Mm00662319_m1 |
| <i>PPAR-γ</i>   | NM_0011273330.1                    | ATGCTGTTATGGGTGAAACTCTG<br>G  | Mm01184322_m1 |
| <i>Foxo1</i>    | NM_019739.3,AK154041.1,AF126056.1  | TCGGCGGGCTGGAAGAATTCAAT<br>TC | Mm00490671_m1 |
| <i>Cpt1a</i>    | NM_013495.2,AK147770.1,AK136487.1  | TTCCAGGAGAATGCCAGGAGGT<br>CAT | Mm01231183_m1 |
| <i>Ppargc1a</i> | NR_027710.1,NM_008904.2,JX866947.1 | CTGGAAGTGCAGGCCTAACTCCT<br>CC | Mm01208835_m1 |
| <i>IL-6</i>     | NM_031168.1,X06203.1,X54542.1      | ATGAGAAAAGAGTTGTGCAATG<br>GCA | Mm00446190_m1 |
| <i>GLUT2</i>    | NM_031197.2                        | CCGCCTCCCCCGGCGCGCACACA<br>CC | Mm00446229_m1 |
| <i>Ucp1</i>     | NM_009463.3,U63419.1,AK002759.1    | TTTCAAAGGGTTTGTGGCTTCTTT<br>T | Mm01244861_m1 |
| <i>Ucp3</i>     | NM_009464.3,AF032902.1,AF030164.1  | GTGGAAAGGGACTTGGCCCAAC<br>ATC | Mm01163394_m1 |
| <i>ATGL</i>     | NM_025802.3                        | CCAAGACTGAATGGCTGGATGG<br>CAA | Mm00503040_m1 |
| <i>MCP-1</i>    | NM_011333.3                        | TCAGCCAGATGCAGTTAACGCCC<br>CA | Mm00441242_m1 |

Table 3. SYBR® primer information (Sigma-Aldrich, MO, USA).

| Gene            | Forward primer sequence (5' → 3') | Reverse primer sequence (5' → 3') |
|-----------------|-----------------------------------|-----------------------------------|
| <i>SREBP-1c</i> | AATAAATCTGCTGTCTTGCG              | CCTTCAGTGATTGCTTTTG               |
